# Supplementary material for: Peritoneal Fluid Cytokines Reveal New Insights of Endometriosis Subphenotypes
Source: MDPI journal article supplement (doi:10.3390/ijms21103515), 2020-05-15
Supplement: s1 [file s1]

**Table S2. Significantly altered cytokines in endometriosis and disease severity by univariate statistical analysis**

| All Phase       | EM+ vs EM-  |         | EM+ <sub>Mild</sub> vs EM- |         | EM+ <sub>Sev</sub> vs EM- |         | EM+ <sub>Sev</sub> vs EM+ <sub>Mild</sub> |         |
|-----------------|-------------|---------|----------------------------|---------|---------------------------|---------|-------------------------------------------|---------|
|                 | Fold Change | P-value | Fold Change                | P-value | Fold Change               | P-value | Fold Change                               | P-value |
| IFN- $\alpha$ 2 | 0.95        | 0.03    | 0.95                       | 0.03    | 0.97                      | 0.29    | 1.02                                      | 0.54    |
| IL-1 $\beta$    | 1.80        | 0.04    | 1.80                       | 0.04    | 1.18                      | 0.24    | 0.65                                      | 0.11    |
| IL-3            | 0.89        | 0.04    | 0.89                       | 0.04    | 0.93                      | 0.46    | 1.04                                      | 0.56    |
| IL-12p70        | 1.20        | 0.24    | 1.20                       | 0.24    | 1.38                      | 0.02    | 1.15                                      | 0.30    |
| IL-16           | 0.96        | 0.01    | 0.96                       | 0.01    | 0.98                      | 0.38    | 1.02                                      | 0.26    |
| IL-18           | 0.79        | 0.42    | 0.79                       | 0.42    | 1.39                      | 0.08    | 1.75                                      | 0.02    |
| MCP-1           | 0.95        | 0.43    | 0.95                       | 0.43    | 1.10                      | 0.11    | 1.15                                      | 0.01    |
| MCP-3           | 0.85        | 0.01    | 0.85                       | 0.01    | 0.97                      | 0.84    | 1.14                                      | 0.05    |
| VEGF-A          | 1.00        | 0.13    | 1.00                       | 0.13    | 1.10                      | 0.05    | 1.10                                      | 0.72    |

  

| Proliferative Phase | EM+ vs EM-  |         | EM+ <sub>Mild</sub> vs EM- |         | EM+ <sub>Sev</sub> vs EM- |         | EM+ <sub>Sev</sub> vs EM+ <sub>Mild</sub> |         |
|---------------------|-------------|---------|----------------------------|---------|---------------------------|---------|-------------------------------------------|---------|
|                     | Fold Change | P-value | Fold Change                | P-value | Fold Change               | P-value | Fold Change                               | P-value |
| CTACK               | 1.08        | 0.02    | 1.08                       | 0.02    | 1.03                      | 0.29    | 0.96                                      | 0.15    |
| IFN- $\alpha$ 2     | 0.94        | 0.05    | 0.94                       | 0.05    | 0.95                      | 0.04    | 1.01                                      | 0.73    |
| IL-12p70            | 1.77        | 0.01    | 1.77                       | 0.01    | 2.11                      | 0.00    | 1.19                                      | 0.36    |
| IL-18               | 1.22        | 0.69    | 1.22                       | 0.69    | 2.03                      | 0.02    | 1.66                                      | 0.11    |
| IP-10               | 1.04        | 0.19    | 1.04                       | 0.19    | 1.07                      | 0.02    | 1.03                                      | 0.41    |
| MCP-1               | 0.97        | 0.74    | 0.97                       | 0.74    | 1.16                      | 0.04    | 1.20                                      | 0.02    |
| MCP-3               | 0.79        | 0.02    | 0.79                       | 0.02    | 1.01                      | 0.89    | 1.27                                      | 0.01    |
| MIP-1 $\alpha$      | 0.78        | 0.16    | 0.78                       | 0.16    | 0.69                      | 0.03    | 0.88                                      | 0.60    |
| VEGF-A              | 1.18        | 0.02    | 1.18                       | 0.02    | 1.32                      | 0.01    | 1.12                                      | 0.80    |

\*No differences in cytokine levels in secretory phase
