# Supplementary material for: Peritoneal Fluid Cytokines Reveal New Insights of Endometriosis Subphenotypes
Source: MDPI journal article supplement (doi:10.3390/ijms21103515), 2020-05-15
Supplement: s1 [file s1]

**Table S4. Significantly altered cytokines in endometriosis subphenotypes by univariate statistical analysis**

| All Phases | OE vs EM-   |         | PE vs EM-   |         | DIE vs EM-  |         |
|------------|-------------|---------|-------------|---------|-------------|---------|
|            | Fold Change | P-value | Fold Change | P-value | Fold Change | P-value |
| IL-16      | 0.79        | 0.102   | 0.65        | 0.024   | 1.04        | 0.816   |
| HGF        | 0.81        | 0.469   | 0.40        | 0.024   | 0.34        | 0.024   |
| IFN-a2     | 0.87        | 0.070   | 0.81        | 0.032   | 0.84        | 0.102   |
| MCP-3      | 0.94        | 0.725   | 0.60        | 0.042   | 0.86        | 0.540   |
| IL-1a      | 1.01        | 0.869   | 0.90        | 0.082   | 1.26        | 0.003   |
| VEGF       | 1.70        | 0.117   | 1.33        | 0.302   | 2.45        | 0.005   |
| IL-12P70   | 1.54        | 0.150   | 1.12        | 0.717   | 1.75        | 0.032   |

  

| Proliferative | OE vs EM-   |         | PE vs EM-   |         | DIE vs EM-  |         |
|---------------|-------------|---------|-------------|---------|-------------|---------|
|               | Fold Change | P-value | Fold Change | P-value | Fold Change | P-value |
| IL-16         | 0.72        | 0.080   | 0.62        | 0.045   | 0.92        | 0.744   |
| IFN-a2        | 0.83        | 0.051   | 0.77        | 0.026   | 0.84        | 0.230   |
| IL-1a         | 0.93        | 0.297   | 0.94        | 0.441   | 1.43        | 0.009   |
| VEGF          | 3.57        | 0.024   | 2.33        | 0.016   | 2.14        | 0.041   |
| IL-12P70      | 3.54        | 0.003   | 2.38        | 0.004   | 2.68        | 0.001   |
| CTACK         | 1.16        | 0.297   | 1.41        | 0.027   | 1.20        | 0.363   |
| TNF-a         | 3.39        | 0.010   | 1.07        | 0.867   | 0.51        | 0.277   |
| IP-10         | 1.78        | 0.012   | 1.14        | 0.588   | 1.41        | 0.207   |
| IL-15         | 1.59        | 0.040   | 1.44        | 0.131   | 1.16        | 0.591   |
| IL-1ra        | 1.53        | 0.137   | 0.89        | 0.755   | 0.33        | 0.049   |

  

| Secretory | OE vs EM-   |         | PE vs EM-   |         | DIE vs EM-  |         |
|-----------|-------------|---------|-------------|---------|-------------|---------|
|           | Fold Change | P-value | Fold Change | P-value | Fold Change | P-value |
| IFN-a2    | 0.84        | 0.389   | 0.84        | 0.299   | 0.83        | 0.047   |
| VEGF      | 0.65        | 0.133   | 0.65        | 0.424   | 2.71        | 0.006   |
| IL-12P70  | 0.59        | 0.173   | 0.59        | 0.342   | 1.43        | 0.029   |
| IL-15     | 0.91        | 0.028   | 0.91        | 0.726   | 1.05        | 0.459   |
| MCP-1     | 0.61        | 0.767   | 0.61        | 0.122   | 1.77        | 0.022   |
