# Supplementary material for: Peritoneal Fluid Cytokines Reveal New Insights of Endometriosis Subphenotypes
Source: MDPI journal article supplement (doi:10.3390/ijms21103515), 2020-05-15
Supplement: s1 [file s1]

**Table S1. List of quantified cytokines, chemokines and growth factors and their abbrevia**  
Detected cytokines in the peritoneal fluids are marked with ticks ( ✓)

| No. | Name                                                                                            | Detected |
|-----|-------------------------------------------------------------------------------------------------|----------|
| 1   | EGF – Epidermal growth factor                                                                   |          |
| 2   | Eotaxin (CCL11) - C-C motif chemokine 11                                                        | ✓        |
| 3   | FGF-2 (FGF basic) - Basic fibroblast growth factor                                              |          |
| 4   | GM-CSF - Granulocyte macrophage colony-stimulating factor                                       | ✓        |
| 5   | GRO $\alpha$ (CXCL1) - Chemokine (C-X-C motif) ligand 1; Growth regulated oncogene-alpha        | ✓        |
| 6   | HGF – Hepatocyte growth factor                                                                  | ✓        |
| 7   | IFN $\gamma$ – Interferon gamma                                                                 | ✓        |
| 8   | IFN $\alpha$ – Interferon alpha                                                                 | ✓        |
| 9   | IL-1RA – Interleukin-1 receptor alpha                                                           | ✓        |
| 10  | IL-1 $\beta$ - Interleukin-1 beta                                                               | ✓        |
| 11  | IL-1 $\alpha$ - Interleukin-1 alpha                                                             | ✓        |
| 12  | IL-2 - Interleukin-2                                                                            |          |
| 13  | IL-4 - Interleukin-4                                                                            |          |
| 14  | IL-5 - Interleukin-5                                                                            |          |
| 15  | IL-6 - Interleukin-6                                                                            | ✓        |
| 16  | IL-7 - Interleukin-7                                                                            | ✓        |
| 17  | IL-8 (CXCL8) - Chemokine (C-X-C motif) ligand 8; Interleukin-8                                  | ✓        |
| 18  | IL-9 - Interleukin-9                                                                            |          |
| 19  | IL-10 - Interleukin-10                                                                          | ✓        |
| 20  | IL-12p40 - Interleukin-12 70kDa heterodimer                                                     | ✓        |
| 21  | IL-12p70 - Interleukin-12 40kDa monodimer                                                       | ✓        |
| 22  | IL-13 - Interleukin-13                                                                          | ✓        |
| 23  | IL-15 - Interleukin-15                                                                          | ✓        |
| 24  | IL-17A - Interleukin-17A                                                                        |          |
| 25  | IL-18 - Interleukin-18                                                                          | ✓        |
| 26  | IP-10 (CXCL10) - C-X-C motif chemokine 10; Interferon gamma-induced protein 10                  | ✓        |
| 27  | LIF - Leukemia inhibitory factor                                                                |          |
| 28  | MCP-1 (CCL2) - Chemokine (C-C motif) ligand 2; Monocyte chemotactic protein 1                   | ✓        |
| 29  | MIP-1 $\alpha$ (CCL3) - Chemokine (C-C motif) ligand 3; Macrophage inflammatory protein 1-alpha | ✓        |
| 30  | MIP-1 $\beta$ (CCL4) - Chemokine (C-C motif) ligand 4; Macrophage inflammatory protein 1-beta   | ✓        |
| 31  | $\beta$ NGF - Beta nerve growth factor                                                          | ✓        |
| 32  | PDGF-BB - Platelet-Derived Growth Factor-BB                                                     |          |
| 33  | RANTES (CCL5) - Chemokine (C-C motif) ligand 5                                                  |          |
| 34  | SCF - Stem cell factor                                                                          | ✓        |

|    |                                                                                         |   |
|----|-----------------------------------------------------------------------------------------|---|
| 35 | SDF1 $\alpha$ (CXCL12) - C-X-C motif chemokine 12; stromal cell-derived factor $\alpha$ | ✓ |
| 36 | TNF $\alpha$ - Tumor necrosis factor alpha                                              | ✓ |
| 37 | TNF $\beta$ (LTA) - Lymphotoxin-alpha; tumor necrosis factor-beta                       | ✓ |
| 38 | VEGF-A - Vascular endothelial growth factor A                                           | ✓ |
| 39 | IL-16                                                                                   | ✓ |
| 40 | IL-3                                                                                    | ✓ |
| 41 | MCP-3                                                                                   | ✓ |
| 42 | MIF                                                                                     | ✓ |
| 43 | MIG                                                                                     | ✓ |
| 44 | SCGF-b                                                                                  | ✓ |
| 45 | TRAIL                                                                                   | ✓ |
| 46 | G-CSF                                                                                   | ✓ |
| 47 | IL-2RA                                                                                  | ✓ |
| 48 | CTACK                                                                                   | ✓ |

itions.
