# Supplementary material for: Peritoneal Fluid Cytokines Reveal New Insights of Endometriosis Subphenotypes
Source: MDPI journal article supplement (doi:10.3390/ijms21103515), 2020-05-15
Supplement: s1 [file s1]

**Table S3. Significantly altered cytokines in endometriosis subphenotypes by univariate statistical analysis**

| All Phases    | OE vs DIE   |         | PE vs DIE   |         | OE vs PE    |         |
|---------------|-------------|---------|-------------|---------|-------------|---------|
|               | Fold Change | P-value | Fold Change | P-value | Fold Change | P-value |
| IL-1 $\alpha$ | 1.20        | 0.009   | 1.30        | 0.0007  | 1.09        | 0.098   |
| IL-1 $\beta$  | 4.09        | 0.004   | 4.56        | 0.0143  | 1.12        | 0.698   |
| IL-1RA        | 1.32        | 0.001   | 1.14        | 0.2754  | 0.86        | 0.079   |
| IL-8          | 0.69        | 0.114   | 0.36        | 0.0091  | 0.47        | 0.014   |
| IL-16         | 0.95        | 0.118   | 0.92        | 0.0192  | 0.97        | 0.397   |
| MCP-1         | 1.03        | 0.687   | 0.82        | 0.0651  | 0.80        | 0.003   |
| TNF- $\alpha$ | 1.50        | 0.003   | 1.19        | 0.2321  | 0.79        | 0.060   |

  

| Proliferative | OE vs DIE   |         | PE vs DIE   |         | OE vs PE    |         |
|---------------|-------------|---------|-------------|---------|-------------|---------|
|               | Fold Change | P-value | Fold Change | P-value | Fold Change | P-value |
| IL-1ra        | 0.66        | 0.003   | 0.74        | 0.061   | 1.13        | 0.306   |
| IL-8          | 1.29        | 0.288   | 3.45        | 0.011   | 2.66        | 0.053   |
| IL-10         | 0.58        | 0.030   | 0.80        | 0.175   | 1.39        | 0.069   |
| MCP-1         | 0.94        | 0.452   | 1.22        | 0.175   | 1.30        | 0.022   |
| TNF-a         | 0.51        | 0.004   | 0.73        | 0.169   | 1.42        | 0.042   |
| IL-1a         | 0.71        | 0.002   | 0.72        | 0.010   | 1.01        | 0.844   |
| IL-2Ra        | 1.06        | 0.369   | 1.20        | 0.039   | 1.13        | 0.093   |

  

| Secretory | OE vs DIE   |         | PE vs DIE   |         | OE vs PE    |         |
|-----------|-------------|---------|-------------|---------|-------------|---------|
|           | Fold Change | P-value | Fold Change | P-value | Fold Change | P-value |
| IL-1b     | -0.12       | 0.000   | -0.09       | 0.017   | 0.69        | 0.271   |
| IL-12P70  | 2.24        | 0.011   | 1.51        | 0.053   | 0.67        | 0.122   |
| IL-13     | 0.59        | 0.105   | 1.00        | 0.996   | 1.68        | 0.030   |
| IL-15     | 1.41        | 0.047   | 1.10        | 0.397   | 0.78        | 0.225   |
| IP-10     | 1.05        | 0.403   | 0.94        | 0.243   | 0.89        | 0.047   |
| MIP-1a    | 0.40        | 0.007   | 0.45        | 0.176   | 1.11        | 0.608   |
| MIP-1b    | 1.84        | 0.003   | 1.25        | 0.321   | 0.68        | 0.039   |
| VEGF      | 1.31        | 0.008   | 1.26        | 0.101   | 0.96        | 0.573   |

|                 |      |       |      |       |      |       |
|-----------------|------|-------|------|-------|------|-------|
| <b>IL-1a</b>    | 0.99 | 0.894 | 0.81 | 0.011 | 0.82 | 0.022 |
| <b>IL-2Ra</b>   | 1.12 | 0.112 | 0.95 | 0.334 | 0.85 | 0.035 |
| <b>IL-12p40</b> | 0.92 | 0.119 | 0.87 | 0.043 | 0.94 | 0.283 |
| <b>IL-16</b>    | 1.08 | 0.203 | 1.11 | 0.043 | 1.03 | 0.588 |
| <b>IL-18</b>    | 1.87 | 0.107 | 3.23 | 0.015 | 1.72 | 0.466 |
| <b>MIF</b>      | 1.08 | 0.207 | 0.93 | 0.307 | 0.86 | 0.018 |
